# Supplementary material for: A Lignocellulolytic Colletotrichum sp. OH with Broad-Spectrum Tolerance to Lignocellulosic Pretreatment Compounds and Derivatives and the Efficiency to Produce Hydrogen Peroxide and 5-Hydroxymethylfurfural Tolerant Cellulases
Source: MDPI journal article supplement (doi:10.3390/jof7100785), 2021-09-22
Supplement: s1 [file s1]

| Combinations | Lac   | LiP   | MnP   | Inhibitor(s)                         |
|--------------|-------|-------|-------|--------------------------------------|
| C1           | 100.0 | 100.0 | 100.0 | None                                 |
| C-15-IC25    | 67.1  | 62.2  | 80.4  | HQ+H <sub>2</sub> O <sub>2</sub>     |
| C-5-IC25     | 61.6  | 92.2  | 75.1  | H <sub>2</sub> O <sub>2</sub>        |
| C-15-IC50    | 36.8  | 30.2  | 65.2  | HQ+H <sub>2</sub> O <sub>2</sub>     |
| C-4-IC25     | 84.5  | 76.2  | 65.0  | HQ                                   |
| C-13-IC25    | 40.4  | 50.6  | 62.3  | LA+HQ                                |
| C-12-IC25    | 41.6  | 46.2  | 60.7  | LA+H <sub>2</sub> O <sub>2</sub>     |
| C-5-IC50     | 41.1  | 54.7  | 57.4  | H <sub>2</sub> O <sub>2</sub>        |
| C-2-IC25     | 61.6  | 53.2  | 54.5  | HMF                                  |
| C-6-IC25     | 57.1  | 46.2  | 50.3  | HMF+HQ                               |
| C-4-IC50     | 45.7  | 42.1  | 48.4  | HQ                                   |
| C-8-IC25     | 24.4  | 25.1  | 45.1  | HMF+LA                               |
| C-12-IC50    | 22.1  | 18.8  | 45.1  | LA+H <sub>2</sub> O <sub>2</sub>     |
| C-3-IC25     | 47.7  | 53.3  | 44.3  | LA                                   |
| C-11-IC25    | 26.3  | 52.1  | 44.0  | HMF+HQ+H <sub>2</sub> O <sub>2</sub> |
| C-13-IC50    | 20.3  | 30.6  | 43.5  | LA+HQ                                |
| C-10-IC25    | 22.1  | 45.6  | 41.6  | HMF+LA+HQ                            |
| C-7-IC25     | 42.9  | 51.3  | 32.1  | HMF+H <sub>2</sub> O <sub>2</sub>    |
| C-9-IC25     | 31.7  | 31.9  | 32.0  | HMF+LA+H <sub>2</sub> O <sub>2</sub> |
| C-11-IC50    | 12.3  | 31.7  | 31.1  | HMF+HQ+H <sub>2</sub> O <sub>2</sub> |
| C-2-IC50     | 31.1  | 24.0  | 30.4  | HMF                                  |
| C-14-IC25    | 24.9  | 42.1  | 30.4  | LA+HQ+H <sub>2</sub> O <sub>2</sub>  |
| C-3-IC50     | 31.1  | 23.4  | 27.1  | LA                                   |
| C-14-IC50    | 12.3  | 26.1  | 26.2  | LA+HQ+H <sub>2</sub> O <sub>2</sub>  |
| C-8-IC50     | 10.5  | 18.3  | 23.0  | HMF+LA                               |
| C-6-IC50     | 24.4  | 33.2  | 22.4  | HMF+HQ                               |
| C-9-IC50     | 13.5  | 12.7  | 22.1  | HMF+LA+H <sub>2</sub> O <sub>2</sub> |
| C-7-IC50     | 10.5  | 35.1  | 20.1  | HMF+H <sub>2</sub> O <sub>2</sub>    |
| C-10-IC50    | 10.5  | 12.3  | 17.3  | HMF+LA+HQ                            |
| C-16-IC25    | 13.0  | 11.0  | 9.0   | ALL                                  |
| C-16-IC50    | 0.0   | 5.1   | 0.0   | ALL                                  |
| C-16-IC75    | 0.0   | 0.0   | 0.0   | ALL                                  |

**Figure S9:** Relative Enzyme Activity of Laccases (Lac), Lignin peroxidases (LiP), and Manganese peroxidases (MnP) in the presence of lignocellulose-derived inhibitor combinations. Three values of each chemical (IC<sub>25</sub>, IC<sub>50</sub>, IC<sub>75</sub>) were tested for enzyme inhibition. The cells are color-coded with green for highest and red for lowest relative activity. The tolerance is defined at > 50% or more relative activity. For several combinations, the IC<sub>75</sub> enzyme activities were not detected.
