# Supplementary material for: A Lignocellulolytic Colletotrichum sp. OH with Broad-Spectrum Tolerance to Lignocellulosic Pretreatment Compounds and Derivatives and the Efficiency to Produce Hydrogen Peroxide and 5-Hydroxymethylfurfural Tolerant Cellulases
Source: MDPI journal article supplement (doi:10.3390/jof7100785), 2021-09-22
Supplement: s1 [file s1]

| Combination | EnG   | BGL   | XLN   | Inhibitor(s)                            | Biomass Growth (IC50) |
|-------------|-------|-------|-------|-----------------------------------------|-----------------------|
| C-5-IC75    | 63.6  | 134.2 | 25.9  | H <sub>2</sub> O <sub>2</sub>           |                       |
| C-5-IC50    | 83.9  | 129.8 | 50.8  |                                         | 45.3                  |
| C-5-IC25    | 124.0 | 125.2 | 86.1  |                                         |                       |
| C-2-IC25    | 91.5  | 132.3 | 85.3  | HMF                                     |                       |
| C-2-IC50    | 60.4  | 124.3 | 64.9  |                                         | 50.7                  |
| C-2-IC75    | 31.9  | 94.0  | 31.2  |                                         |                       |
| C-7-IC25    | 82.5  | 95.0  | 75.6  | HMF+H <sub>2</sub> O <sub>2</sub>       |                       |
| C-7-IC50    | 58.8  | 50.0  | 53.7  |                                         | 43.5                  |
| C-7-IC75    | 31.6  | 32.0  | 46.3  |                                         |                       |
| C-6-IC25    | 76.8  | 89.5  | 64.9  | HMF+HQ                                  |                       |
| C-6-IC50    | 48.9  | 38.5  | 51.9  |                                         | 38.9                  |
| C-6-IC75    | 19.1  | 30.4  | 32.6  |                                         |                       |
| C-11-IC25   | 75.3  | 52.0  | 53.0  | HMF+HQ+H <sub>2</sub> O <sub>2</sub>    |                       |
| C-11-IC50   | 38.7  | 31.0  | 32.8  |                                         | 22.5                  |
| C-11-IC75   | 8.1   | 8.0   | 15.0  |                                         |                       |
| C-8-IC25    | 64.0  | 63.0  | 69.9  | HMF+LA                                  |                       |
| C-8-IC50    | 40.9  | 38.5  | 51.0  |                                         | 45.3                  |
| C-8-IC75    | 21.3  | 21.2  | 37.4  |                                         |                       |
| C-9-IC25    | 61.5  | 62.5  | 61.9  | HMF+LA+H <sub>2</sub> O <sub>2</sub>    |                       |
| C-9-IC50    | 41.4  | 20.0  | 59.0  |                                         | 29.0                  |
| C-9-IC75    | 6.6   | 3.6   | 12.9  |                                         |                       |
| C-10-IC25   | 60.0  | 45.9  | 51.3  | HMF+LA+HQ                               |                       |
| C-10-IC50   | 37.9  | 34.8  | 39.1  |                                         | 30.8                  |
| C-10-IC75   | 10.0  | 7.4   | 7.0   |                                         |                       |
| C-16-IC25   | 4.4   | 26.6  | 39.05 | HMF+LA+HQ+H <sub>2</sub> O <sub>2</sub> | 0                     |
| C-16-IC50   | 1.4   | 11.1  | 19.27 |                                         |                       |
| C-16-IC75   | 1.2   | 1.6   | 5.53  |                                         |                       |
| C-4-IC25    | 58.7  | 59.3  | 51.3  | HQ                                      |                       |
| C-4-IC50    | 42.1  | 34.8  | 33.2  |                                         | 57.4                  |
| C-4-IC75    | 0.0   | 13.1  | 7.0   |                                         |                       |
| C-15-IC25   | 62.3  | 63.5  | 61.94 | HQ+H <sub>2</sub> O <sub>2</sub>        |                       |
| C-15-IC50   | 38.7  | 34.8  | 30.86 |                                         | 45.7                  |
| C-15-IC75   | 7.0   | 5.6   | 15.56 |                                         |                       |
| C-3-IC25    | 64.0  | 91.0  | 82.6  | LA                                      |                       |
| C-3-IC50    | 82.5  | 38.4  | 34.2  |                                         | 65.2                  |
| C-3-IC75    | 19.1  | 13.7  | 9.6   |                                         |                       |
| C-12-IC25   | 62.3  | 61.8  | 62.4  | LA+H <sub>2</sub> O <sub>2</sub>        |                       |
| C-12-IC50   | 42.2  | 40.1  | 49.9  |                                         | 46.7                  |
| C-12-IC75   | 14.3  | 23.0  | 23.7  |                                         |                       |
| C-13-IC25   | 59.0  | 42.3  | 60.9  | LA+HQ                                   |                       |
| C-13-IC50   | 39.8  | 33.5  | 35.57 |                                         | 42.0                  |
| C-13-IC75   | 11.3  | 10.7  | 19    |                                         |                       |
| C-14-IC25   | 58.7  | 52.0  | 49.9  | LA+HQ+H <sub>2</sub> O <sub>2</sub>     |                       |
| C-14-IC50   | 25.1  | 26.6  | 32.76 |                                         | 29.0                  |
| C-14-IC75   | 5.0   | 7.8   | 9.93  |                                         |                       |
| C-1         | 100.0 | 100.0 | 100.0 | NONE                                    | 100.0                 |

**Figure S8:** Relative Enzyme activity of Endoglucanases (EnG),  $\beta$ -glucosidases (BGL), and Xylanases (XLN) in the presence of lignocellulose-derived inhibitor combinations. Three concentrations (IC<sub>25</sub>, IC<sub>50</sub>, IC<sub>75</sub>) of each chemical were tested for enzyme inhibition. The codes in the first column correspond to the respective chemicals in the 5<sup>th</sup> column. The relative biomass at IC<sub>50</sub> value is mentioned for comparison. The cells are color-coded with green for highest and red for lowest relative activity. The tolerance is defined at > 50% or more relative activity.
