# Supplementary material for: A Lignocellulolytic Colletotrichum sp. OH with Broad-Spectrum Tolerance to Lignocellulosic Pretreatment Compounds and Derivatives and the Efficiency to Produce Hydrogen Peroxide and 5-Hydroxymethylfurfural Tolerant Cellulases
Source: MDPI journal article supplement (doi:10.3390/jof7100785), 2021-09-22
Supplement: s1 [file s1]

**Title: A Lignocellulolytic *Colletotrichum* sp. OH with Broad-Spectrum Tolerance to Lignocellulosic Pretreatment Compounds and Derivatives and the Efficiency to Produce Hydrogen Peroxide and 5-Hydroxymethylfurfural Tolerant Cellulases**

**Kakoli Chanda<sup>1</sup>, Atifa Begum Mozumder<sup>1</sup>, Ringhoilal Chorei<sup>1</sup>, Ridip Kumar Gogoi<sup>1</sup> & Himanshu Kishore Prasad<sup>1\*</sup>**

Department of Life Science and Bioinformatics, Assam University, Silchar 788011, India;  
kakolimic@gmail.com (K.C.); atifamozumder@gmail.com (A.B.M.);  
choreiringhoilal@gmail.com (R.C.);  
ridip.gogoi09@gmail.com (R.K.G)  
\*: Corresponding author: e-mail: himanshu.k.prasad@aus.ac.in.

**Figure S1:** Uncompressed Rooted Maximum-likelihood phylogenetic tree using s ITS gene sequences

**Figure S2:** Rooted Neighbor-joining phylogenetic tree based on sequences of LSU gene

**Figure S3:** Growth of *Colletotrichum* sp. OH on different carbon sources

**Figure S4:** The growth patterns of *Colletotrichum* sp. OH in different pH (4-13) at 30°C

**Figure S5:** Cell wall stress-tolerant capability of *Colletotrichum* sp. OH

**Figure S6:** Growth profile of *Colletotrichum* sp. OH on commercial media and agro-waste at 30°C

**Figure S7:** Pectinase activity of *Colletotrichum* sp. OH in the presence of 1% citrus pectin

**Figure S8:** Relative Enzyme activity of Endoglucanases (EnG),  $\beta$ -glucosidases (BGL), and Xylanases (XLN) in the presence of lignocellulose-derived inhibitor combinations

**Figure S9:** Relative Enzyme Activity of Laccases (Lac), Lignin peroxidases (LiP), and Manganese peroxidases (MnP) in the presence of lignocellulose-derived inhibitor combinations.
